# Supplementary material
Source: PubMed Central journal article supplement (PMC5436804)
Supplement: NIHMS823200-supplement-01.pdf [file NIHMS823200-supplement-01.pdf]

Table S1.

*Demographics by Group (N =131).*

|                                 | <i>BPD (n = 80)</i> |          | <i>DD (n = 51)</i> |          |
|---------------------------------|---------------------|----------|--------------------|----------|
|                                 | <i>n</i>            | <i>%</i> | <i>n</i>           | <i>%</i> |
| <i>Ethnicity</i>                |                     |          |                    |          |
| African-American                | 5                   | 6.3%     | 4                  | 7.8%     |
| Hispanic                        | 3                   | 3.8%     | 2                  | 3.9%     |
| Caucasian                       | 67                  | 83.3%    | 44                 | 86.3%    |
| Native American                 | 0                   | 0%       | 1                  | 2.0%     |
| Asian-American                  | 2                   | 2.5%     | 0                  | 0%       |
| Other                           | 1                   | 1.3%     | 0                  | 0%       |
| <i>Marital Status</i>           |                     |          |                    |          |
| Single, Never Married           | 41                  | 51.3%    | 23                 | 45.1%    |
| Married                         | 13                  | 16.3%    | 13                 | 25.5%    |
| Cohabiting                      | 9                   | 11.3%    | 6                  | 11.8%    |
| Divorced or Separated           | 17                  | 21.3%    | 9                  | 17.7%    |
| <i>Annual Income</i>            |                     |          |                    |          |
| \$0 to \$25,000                 | 57                  | 71.3%    | 35                 | 68.6%    |
| \$25,001 to \$50,000            | 12                  | 15.0%    | 10                 | 19.6%    |
| \$50,001 to \$75,000            | 5                   | 6.3%     | 3                  | 5.9%     |
| \$75,001 to \$100,000           | 4                   | 5.0%     | 1                  | 1.9%     |
| Above \$100,000                 | 2                   | 2.5%     | 2                  | 3.9%     |
| Currently Employed <sup>a</sup> | 39                  | 48.8%    | 24                 | 47.1%    |

Note. BPD = Borderline Personality Disorder; DD = Depressive Disorder.

<sup>a</sup> Employment information was unavailable for 2 individuals in the DD group and 1 individual in the BPD group.

Table S2.  
 Current co-morbid disorders by group (N=131).

|                                      | <i>BPD (n = 80)</i> |          | <i>DD (n = 51)</i> |          |
|--------------------------------------|---------------------|----------|--------------------|----------|
|                                      | <i>n</i>            | <i>%</i> | <i>n</i>           | <i>%</i> |
| <i>Any mood disorder<sup>a</sup></i> | 50                  | 62.5%    | 51                 | 100%     |
| Major Depression                     | 25                  | 31.3%    | 42                 | 82.4%    |
| Depressive Disorder NOS              | 1                   | 1.3%     | 0                  | 0.0%     |
| Dysthymia                            | 14                  | 17.5%    | 22                 | 43.1%    |
| Bipolar I disorder                   | 14                  | 17.5%    | 0                  | 0.0%     |
| Bipolar II disorder                  | 2                   | 2.5%     | 0                  | 0.0%     |
| Bipolar disorder - other             | 4                   | 5.0%     | 0                  | 0.0%     |
| <i>Any anxiety disorder</i>          | 63                  | 78.8%    | 34                 | 66.7%    |
| Panic Disorder                       | 20                  | 25.0%    | 8                  | 15.7%    |
| Agoraphobia                          | 3                   | 3.8%     | 2                  | 3.9%     |
| Social Phobia                        | 24                  | 30.0%    | 17                 | 33.3%    |
| Specific Phobia                      | 17                  | 21.3%    | 7                  | 13.7%    |
| Obsessive-Compulsive Disorder        | 20                  | 25.0%    | 5                  | 9.8%     |
| Posttraumatic Stress Disorder        | 27                  | 33.8%    | 11                 | 21.6%    |
| Generalized Anxiety Disorder         | 32                  | 40.0%    | 16                 | 31.4%    |
| Anxiety Disorder NOS                 | 3                   | 3.8%     | 4                  | 7.8%     |
| <i>Any eating disorder</i>           | 18                  | 22.5%    | 3                  | 5.9%     |
| <i>Any substance use disorder</i>    | 14                  | 17.5%    | 3                  | 5.9%     |
| <i>Any PD other than Borderline</i>  | 74                  | 92.5%    | 20                 | 39.2%    |
| Narcissistic PD                      | 8                   | 10.0%    | 0                  | 0.0%     |
| Histrionic PD                        | 7                   | 8.8%     | 0                  | 0.0%     |
| Antisocial PD <sup>b</sup>           | 18                  | 22.5%    | 2                  | 3.9%     |
| Schizotypal PD                       | 2                   | 2.5%     | 0                  | 0.0%     |
| Schizoid PD                          | 0                   | 0.0%     | 0                  | 0.0%     |
| Paranoid PD                          | 11                  | 13.8%    | 1                  | 2.0%     |
| Avoidant PD                          | 28                  | 35.0%    | 16                 | 31.4%    |
| Dependent PD                         | 8                   | 10.0%    | 2                  | 3.9%     |
| Obsessive Compulsive PD              | 19                  | 23.8%    | 6                  | 11.8%    |

*Note.* BPD = Borderline Personality Disorder; DD = Depressive Disorder; PD = Personality Disorder; NOS = not otherwise specified. There were no cases of mood or anxiety disorders due to a general medical condition or substance induced.

<sup>a</sup>There were 3 BPD individuals with unavailable Axis I and II diagnostic data, with the exception

that 2 of these individuals did provide data for the mood disorder category.

<sup>b</sup>For Antisocial PD, only Criterion A was assessed.

Table S3.

*Breakdown of percentage of all reports in which individuals indicated contact with and rejection and/or disagreement by various targets, split by specific targets and presented separately for the BPD and DD group.*

|         | BPD            |               |                 | DD             |               |                 |
|---------|----------------|---------------|-----------------|----------------|---------------|-----------------|
|         | <i>Contact</i> | <i>Reject</i> | <i>Disagree</i> | <i>Contact</i> | <i>Reject</i> | <i>Disagree</i> |
| Any     | 65.84          | 16.04         | 13.14           | 64.44          | 12.85         | 10.47           |
| Partner | 28.72          | 9.38          | 6.66            | 23.83          | 5.87          | 5.11            |
| Work    | 3.35           | 1.12          | 1.02            | 4.66           | 1.57          | 1.93            |
| Friends | 27.58          | 3.71          | 2.44            | 21.15          | 1.98          | 1.56            |
| Family  | 37.04          | 4.70          | 5.09            | 39.76          | 5.48          | 3.81            |

*Note.* Percentages represent the total proportion of occasions where individuals reported having contact with, feeling rejected by, and having a disagreement with each target.

Table S4.

*Estimates, standard errors, and p-values for rejection and disagreement predicting hostility, sadness, and fear in Borderline Personality Disorder without comorbid Depression, Borderline Personality Disorder with comorbid Depression, and a depressed group, using a multivariate multi-level model.*

| Predictors | BPD without DD<br>(n = 44) |             |                 | BPD with DD<br>(n = 36) |             |                 | DD<br>(n = 51) |             |                 |
|------------|----------------------------|-------------|-----------------|-------------------------|-------------|-----------------|----------------|-------------|-----------------|
|            | <i>Est.</i>                | <i>SE</i>   | <i>P</i>        | <i>Est.</i>             | <i>SE</i>   | <i>p</i>        | <i>Est</i>     | <i>SE</i>   | <i>P</i>        |
| Hostility  |                            |             |                 |                         |             |                 |                |             |                 |
| Mom rej    | <b>0.27</b>                | <b>0.02</b> | <b>&lt;.001</b> | 0.22                    | 0.03        | <.001           | 0.20           | 0.02        | <.001           |
| Day rej    | 0.58                       | 0.08        | <.001           | 0.54                    | 0.07        | <.001           | 0.40           | 0.06        | <.001           |
| Person rej | 0.82                       | 0.68        | .237            | 1.82                    | 0.48        | <.001           | 1.19           | 0.46        | .010            |
| Mom dis    | <b>0.38</b>                | <b>0.02</b> | <b>&lt;.001</b> | 0.34                    | 0.03        | <.001           | 0.30           | 0.02        | <.001           |
| Day dis    | <b>0.76</b>                | <b>0.08</b> | <b>&lt;.001</b> | 0.61                    | 0.08        | <.001           | 0.48           | 0.08        | <.001           |
| Person dis | 1.23                       | 0.84        | .147            | -0.88                   | 0.86        | .305            | 0.52           | 0.70        | .460            |
| Sadness    |                            |             |                 |                         |             |                 |                |             |                 |
| Mom rej    | 0.33                       | 0.02        | <.001           | 0.31                    | 0.03        | <.001           | 0.35           | 0.02        | <.001           |
| Day rej    | 0.75                       | 0.10        | <.001           | <u>1.03</u>             | <u>0.08</u> | <u>&lt;.001</u> | <i>0.55</i>    | <i>0.08</i> | <i>&lt;.001</i> |
| Person rej | 2.67                       | 0.99        | .008            | 2.76                    | 0.68        | <.001           | 1.74           | 0.67        | .009            |
| Mom dis    | 0.14                       | 0.02        | <.001           | 0.13                    | 0.03        | <.001           | 0.12           | 0.02        | <.001           |
| Day dis    | 0.20                       | 0.10        | .049            | 0.06                    | 0.10        | .579            | 0.24           | 0.09        | .008            |
| Person dis | -0.71                      | 1.20        | .556            | -1.80                   | 1.23        | .148            | -1.12          | 1.00        | .267            |
| Fear       |                            |             |                 |                         |             |                 |                |             |                 |
| Mom rej    | 0.16                       | 0.02        | <.001           | 0.12                    | 0.03        | <.001           | 0.15           | 0.02        | <.001           |
| Day rej    | 0.43                       | 0.08        | <.001           | 0.37                    | 0.07        | <.001           | 0.40           | 0.06        | <.001           |
| Person rej | 0.43                       | 0.84        | .611            | 1.31                    | 0.58        | .025            | 1.78           | 0.56        | .002            |
| Mom dis    | 0.14                       | 0.02        | <.001           | 0.08                    | 0.03        | .002            | 0.13           | 0.02        | <.001           |
| Day dis    | 0.25                       | 0.09        | .004            | 0.17                    | 0.08        | .047            | 0.22           | 0.08        | .003            |
| Person dis | <b>2.01</b>                | <b>1.03</b> | <b>.052</b>     | <u>-1.50</u>            | <u>1.05</u> | <u>.155</u>     | -0.72          | 0.85        | .399            |

*Note.* BPD = Borderline Personality Disorder, DD = Depressive Disorder, Est. = estimate, mom rej = momentary rejection, day rej = daily rejection, person rej = person average rejection, mom dis = momentary disagreement, day dis = daily disagreement, person dis = person average disagreement. Significant differences between the groups BPD without depression and DD are highlighted in boldface.

Significant differences between the groups BPD with depression and DD are italicized. Significant differences between the groups BPD without depression and BPD with depression are underlined.

Table S5.

*Odds Ratios, standard errors, and p-values for hostility, sadness, and fear, predicting rejection and disagreement in a logistic multivariate multilevel model.*

| <i>Predictors</i> | <i>BPD without DD</i> |                 | <i>BPD with DD</i> |                 | <i>DD</i>       |                 |
|-------------------|-----------------------|-----------------|--------------------|-----------------|-----------------|-----------------|
|                   | <i>(n = 44)</i>       |                 | <i>(n = 36)</i>    |                 | <i>(n = 51)</i> |                 |
|                   | <i>OR</i>             | <i>p</i>        | <i>OR</i>          | <i>p</i>        | <i>OR</i>       | <i>p</i>        |
| Mom host          | 2.10                  | <.001           | 2.81               | <.001           | <i>1.95</i>     | <i>&lt;.001</i> |
| Mom sadn          | 2.43                  | <.001           | <u>1.70</u>        | <u>&lt;.001</u> | <i>2.35</i>     | <i>&lt;.001</i> |
| Mom fear          | 1.02                  | .879            | 0.84               | .196            | 0.99            | .958            |
| Day host          | 2.54                  | <.001           | 1.67               | .005            | 1.90            | <.001           |
| Day sadn          | 1.61                  | .004            | <u>3.13</u>        | <u>&lt;.001</u> | <i>1.33</i>     | <i>.059</i>     |
| Day fear          | 0.98                  | .921            | <u>0.53</u>        | <u>&lt;.001</u> | <i>1.72</i>     | <i>.008</i>     |
| Pers host         | 5.01                  | .165            | 1.56               | .505            | 3.23            | .051            |
| Pers sadn         | 2.43                  | .158            | 2.25               | .107            | 1.16            | .671            |
| Pers fear         | 0.87                  | .826            | 0.40               | .156            | 1.66            | .296            |
| Mom host          | 3.77                  | <.001           | 4.54               | <.001           | 3.83            | <.001           |
| Mom sadn          | 1.21                  | .107            | 1.08               | .480            | 1.18            | .115            |
| Mom fear          | 0.96                  | .777            | 0.80               | .119            | <i>1.34</i>     | <i>.037</i>     |
| Day host          | <b>3.78</b>           | <b>&lt;.001</b> | 3.45               | <.001           | 2.21            | <.001           |
| Day sadn          | 0.79                  | .158            | 0.93               | .625            | 0.95            | .701            |
| Day fear          | <b>0.78</b>           | <b>.243</b>     | 0.67               | .011            | <i>1.38</i>     | <i>.103</i>     |
| Pers host         | 10.82                 | .012            | 1.48               | .480            | 2.17            | .121            |
| Pers sadn         | 0.67                  | .447            | 0.87               | .751            | 0.76            | .358            |
| Pers fear         | 1.08                  | .878            | 0.56               | .279            | 0.81            | .596            |

*Note.* BPD = Borderline Personality Disorder, DD = Depressive Disorder, OR = odds ratio, mom host = momentary hostility, mom sadn = momentary sadness, mom fear = momentary fear; day host = daily hostility, day sadn = daily sadness, day fear = daily fear, pers host = person level hostility, pers sadn = person level sadness, pers fear = person level fear. Significant differences between the groups BPD without depression and DD are highlighted in boldface. Significant differences between the groups BPD with depression and DD are italicized. Significant differences between the groups BPD without depression

and BPD with depression are underlined.
